# Supplementary material for: Intravenous Sodium Thiosulphate for Calciphylaxis of Chronic Kidney Disease: A Systematic Review and Meta-analysis
Source: PubMed Central journal article supplement (PMC10134003; doi:10.1001/jamanetworkopen.2023.10068), 2023-04-26
Supplement: jamanetwopen-e2310068-s002.pdf [file jamanetwopen-e2310068-s002.pdf]

## Data Sharing Statement

Wen. Intravenous Sodium Thiosulphate for Calciphylaxis of Chronic Kidney Disease. *JAMA Netw Open*. Published April 26, 2023. doi:10.1001/jamanetworkopen.2023.10068

### Data

**Data available:** Yes

**Data types:** Other (please specify)

**Additional Information:** Data extraction forms

**How to access data:** [wwa01275@btch.edu.cn](mailto:wwa01275@btch.edu.cn)

**When available:** With publication

### Supporting Documents

**Document types:** None

### Additional Information

**Who can access the data:** researchers whose proposed use of the data has been approved

**Types of analyses:** For future study

**Mechanisms of data availability:** after approval of a proposal,

**Any additional restrictions:** Only for research use
